# Supplementary material
Source: MDPI journal article supplement (https://www.mdpi.com/2304-6732/8/11/513)
Supplement: s1 [file s1]

# Supplementary Materials

## Super-resolution imaging with patchy microspheres

Qingqing Shang<sup>‡</sup>, Fen Tang<sup>‡</sup>, Lingya Yu, Hamid Oubaha, Darwin Caina,  
Songlin Yang, Sorin Melinte, Chao Zuo, Zengbo Wang and Ran Ye\*

Correspondence: ran.ye@njnu.edu.cn

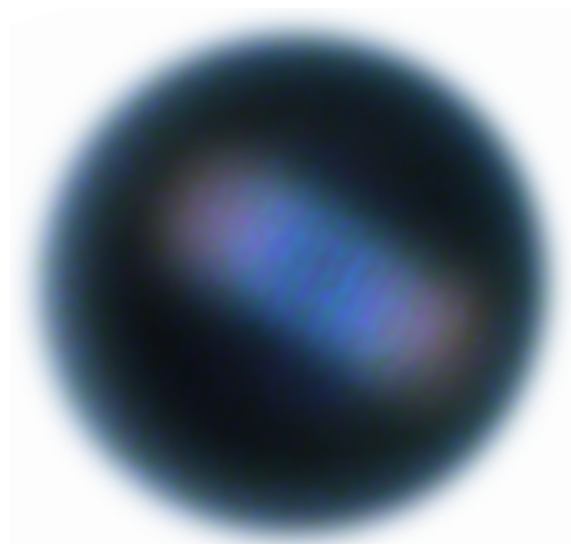

**Figure S1.** Optical microscopic image of a Blu-ray disc observed under a bright-field reflection microscope through a patchy BaTiO<sub>3</sub> microsphere which has a diameter of 35  $\mu\text{m}$  and is partially coated with 100 nm-thick aluminum thin films.

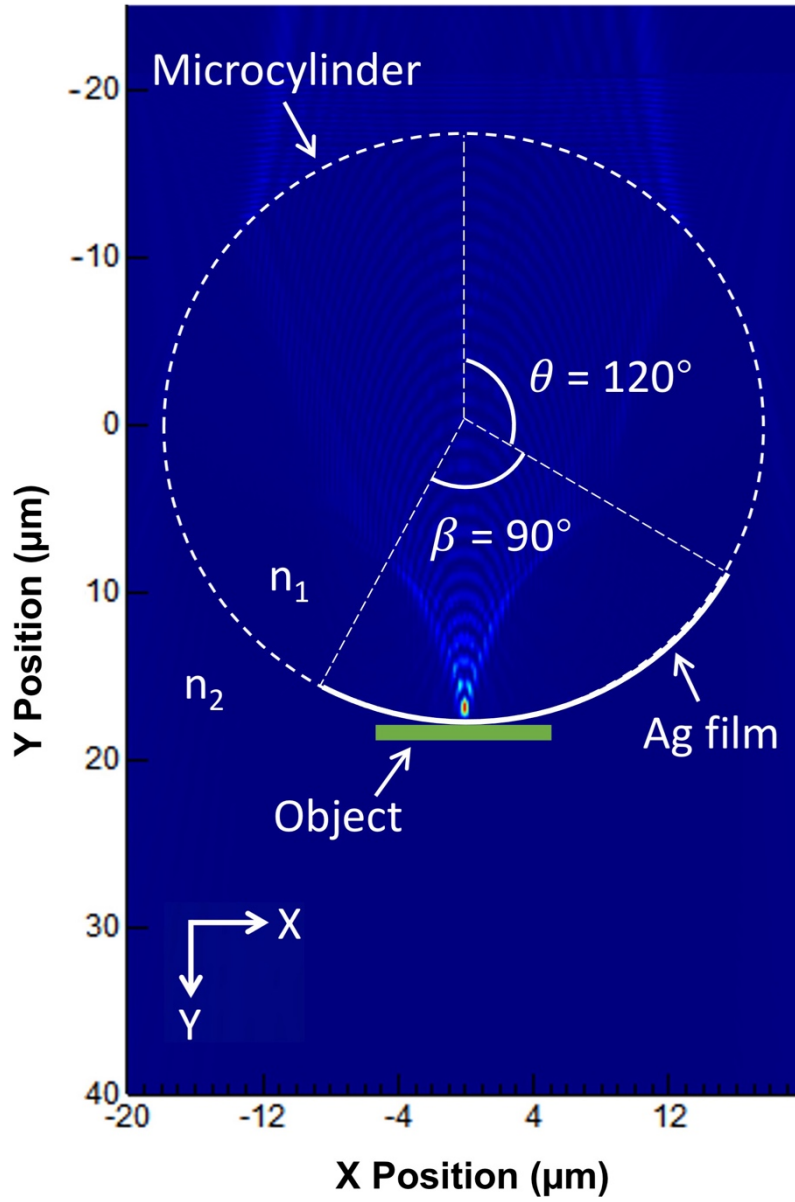

**Figure S2.** The FDTD-simulated light field of a 35  $\mu\text{m}$ -diameter patchy cylinder ( $n_1 = 1.9$ ) in air ( $n_2 = 1.0$ ) partially covered with a 100 nm-thick Ag film, in which the incident light is reflected by the Ag film and cannot illuminate the observation sample. The Ag film has an opening angle  $\beta$  of  $90^\circ$  and a rotation angle  $\theta$  of  $120^\circ$ .
